# Supplementary material
Source: MDPI journal article supplement (https://www.mdpi.com/2073-4344/12/2/241)
Supplement: s1 [file s1]

# The Inorganic Perovskite-Catalyzed Transfer Hydrogenation of Cinnamaldehyde Using Glycerol as a Hydrogen Donor

Tafadzwa Precious Mabate, Reinout Meijboom, Ndzondelelo Bingwa\*

*Research Center for Synthesis and Catalyst, Department of Chemical Sciences, University of Johannesburg, PO Box 524, Auckland Park 2006, Johannesburg, South Africa*

\*tel.: +27115593209; fax: +27115592819; email: [nbingwa@uj.ac.za](mailto:nbingwa@uj.ac.za)

## Supplementary information

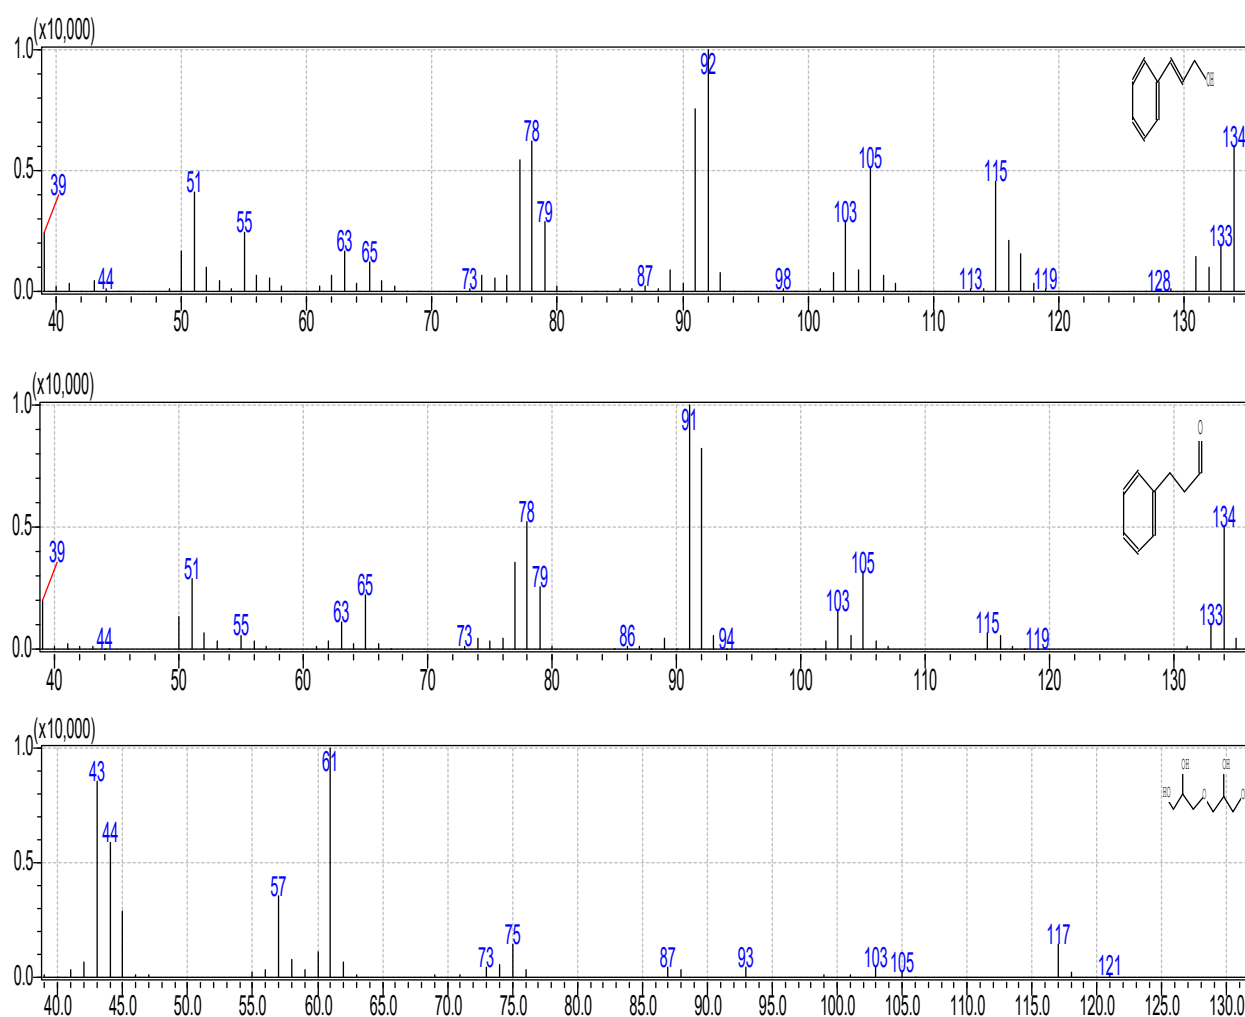

**Figure S1:** Mass spectrum of the major products during the cinnamaldehyde catalytic transfer hydrogenation reaction, that is, cinnamyl alcohol, cinnamaldehyde and diglycerol, respectively.

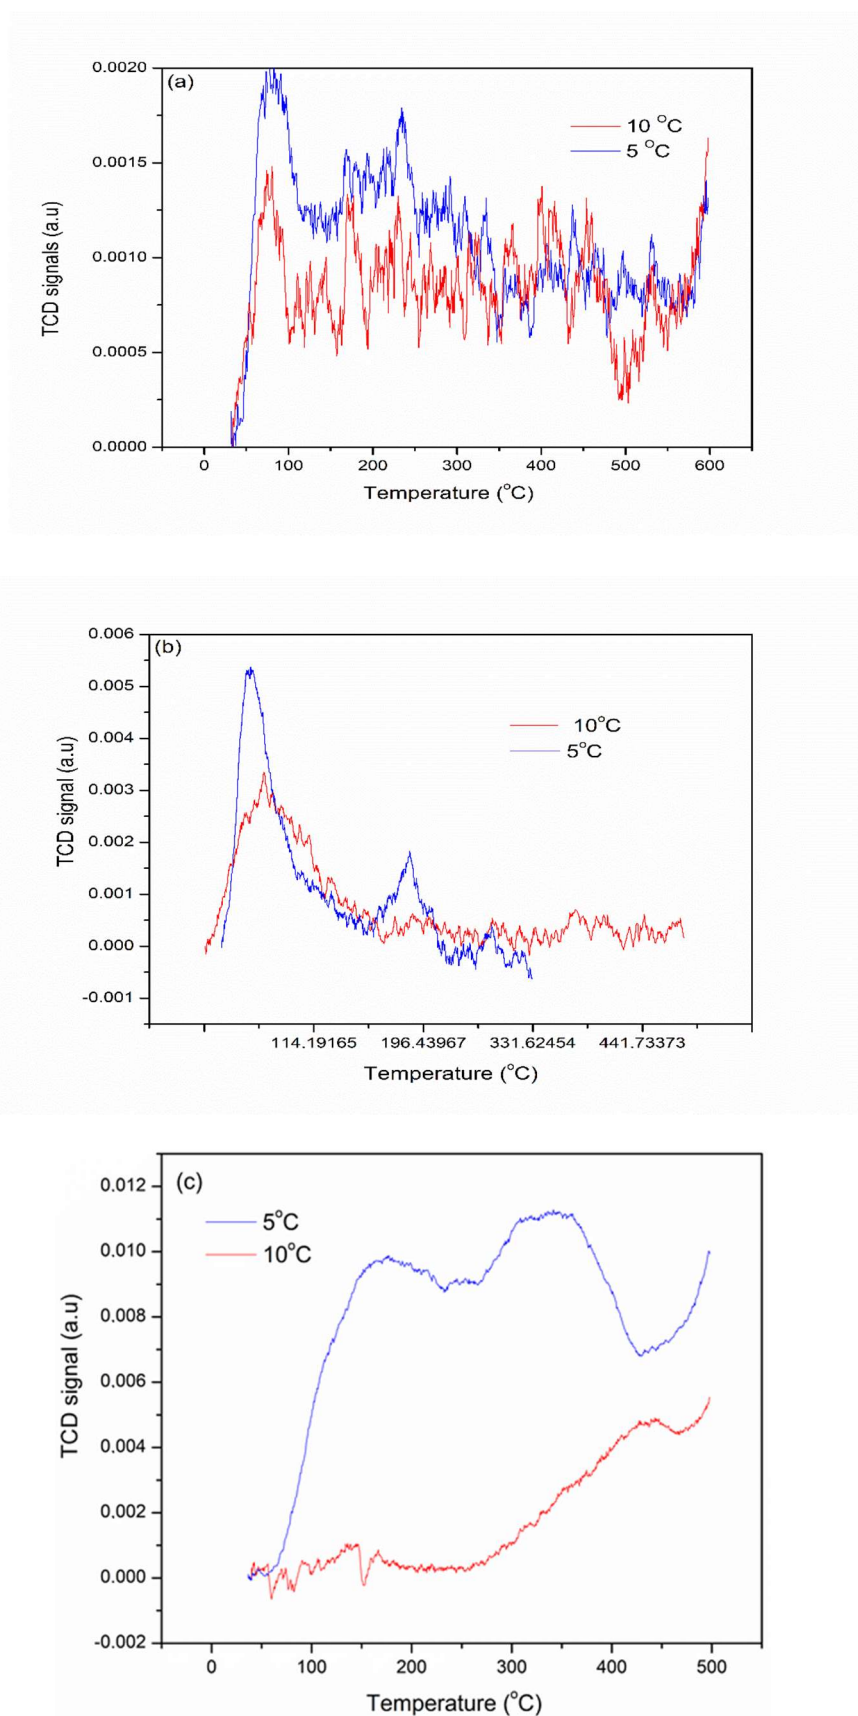

**Figure S2:** Carbon dioxide-temperature-programmed reduction profiles for (a) LaFeO<sub>3</sub>, (b) LaSnO<sub>3</sub>, and (c) SnO<sub>2</sub> at various temperature ramping.

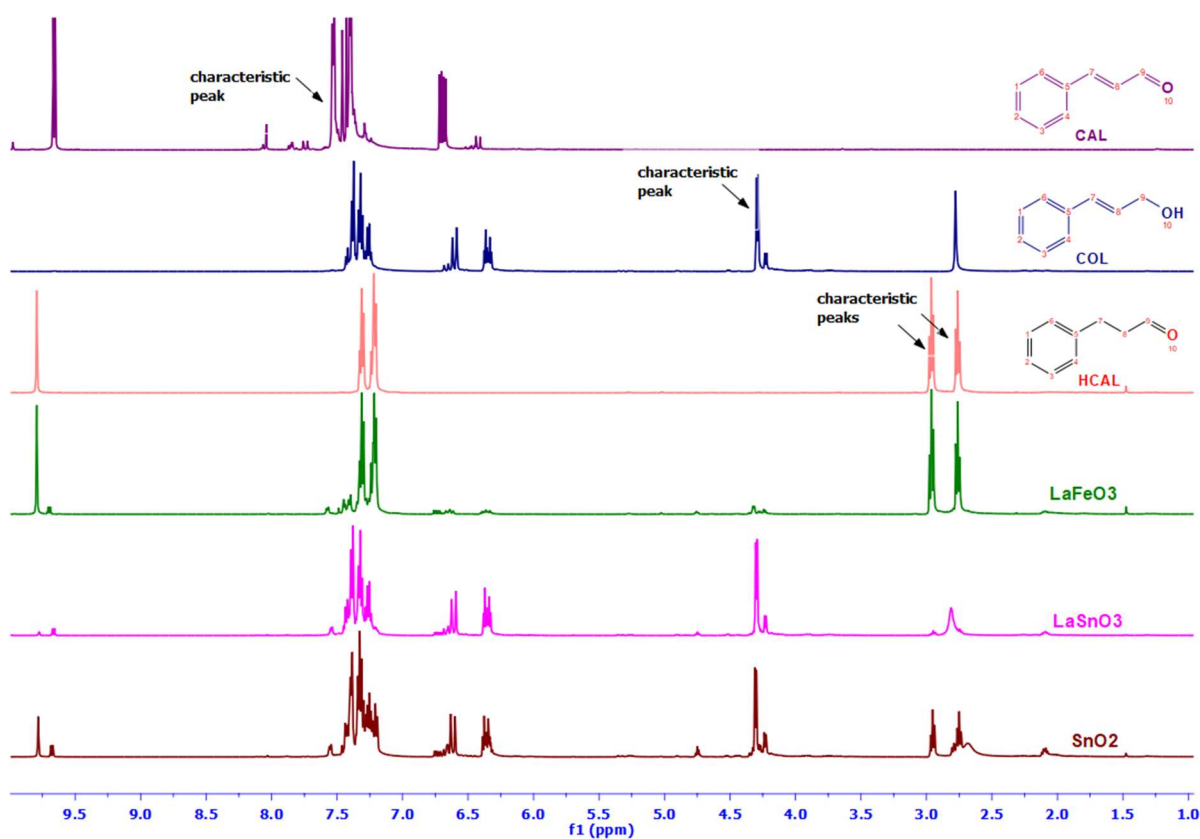

**Figure S3:** A stack of  $^1\text{H}$ -NMR from a product mixture of CAL, COL and HCAL.

**Table S1:** Mass loss and selectivity variations during different reaction cycles for perovskite and SnO<sub>2</sub> (Recyclability results)

|     | SnO <sub>2</sub> | LaFeO <sub>3</sub> | LaSnO <sub>3</sub> | Percentage       | recovery           | (%)                | Selectivity      | (%)                |                    |
|-----|------------------|--------------------|--------------------|------------------|--------------------|--------------------|------------------|--------------------|--------------------|
| Run |                  |                    |                    | SnO <sub>2</sub> | LaFeO <sub>3</sub> | LaSnO <sub>3</sub> | SnO <sub>2</sub> | LaFeO <sub>3</sub> | LaSnO <sub>3</sub> |
| 1   | 0.075            | 0.075              | 0.075              | 100              | 100                | 100                | 40               | 18                 | 6                  |
| 2   | 0.071            | 0.074              | 0.074              | 95               | 98                 | 99                 | 48               | 41                 | 48                 |
| 3   | 0.069            | 0.072              | 0.073              | 93               | 96                 | 98                 | 53               | 45                 | 65                 |
| 4   | 0.067            | 0.069              | 0.071              | 89               | 93                 | 95                 | 65               | 63                 | 78                 |
| 5   | 0.064            | 0.066              | 0.068              | 85               | 88                 | 92                 | 74               | 92                 | 78                 |
